# Supplementary material
Source: PubMed Central journal article supplement (PMC3412956)
Supplement: NIHMS396794-supplement-svplot.pdf [file NIHMS396794-supplement-svplot.pdf]

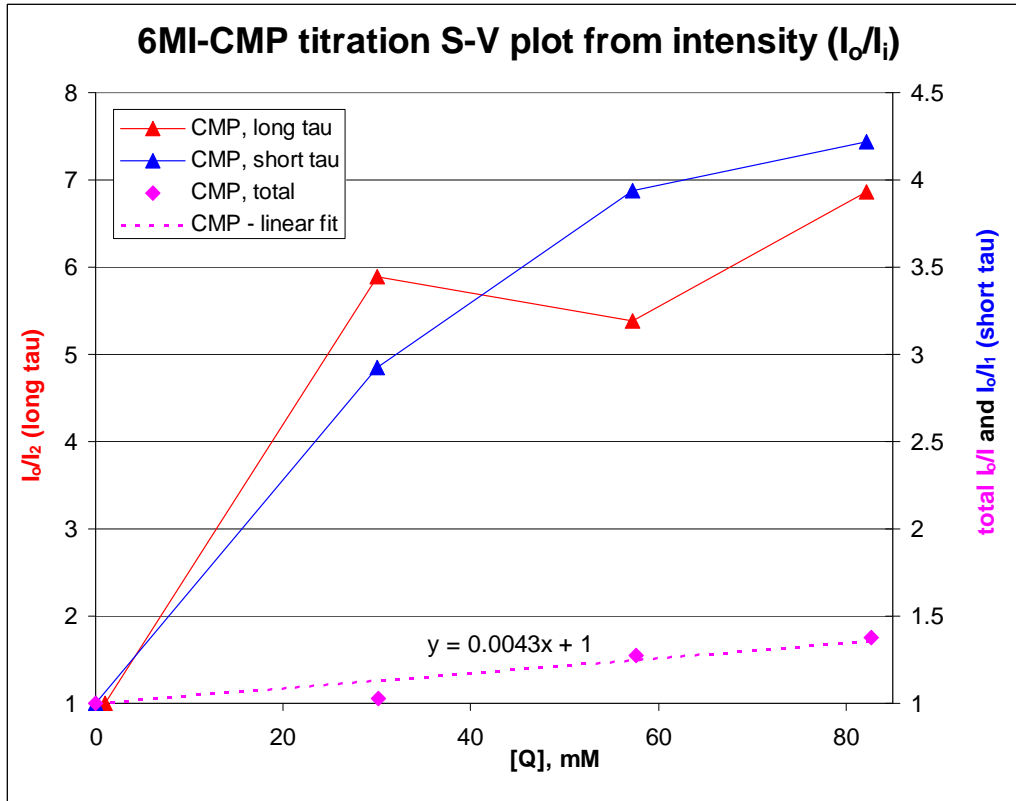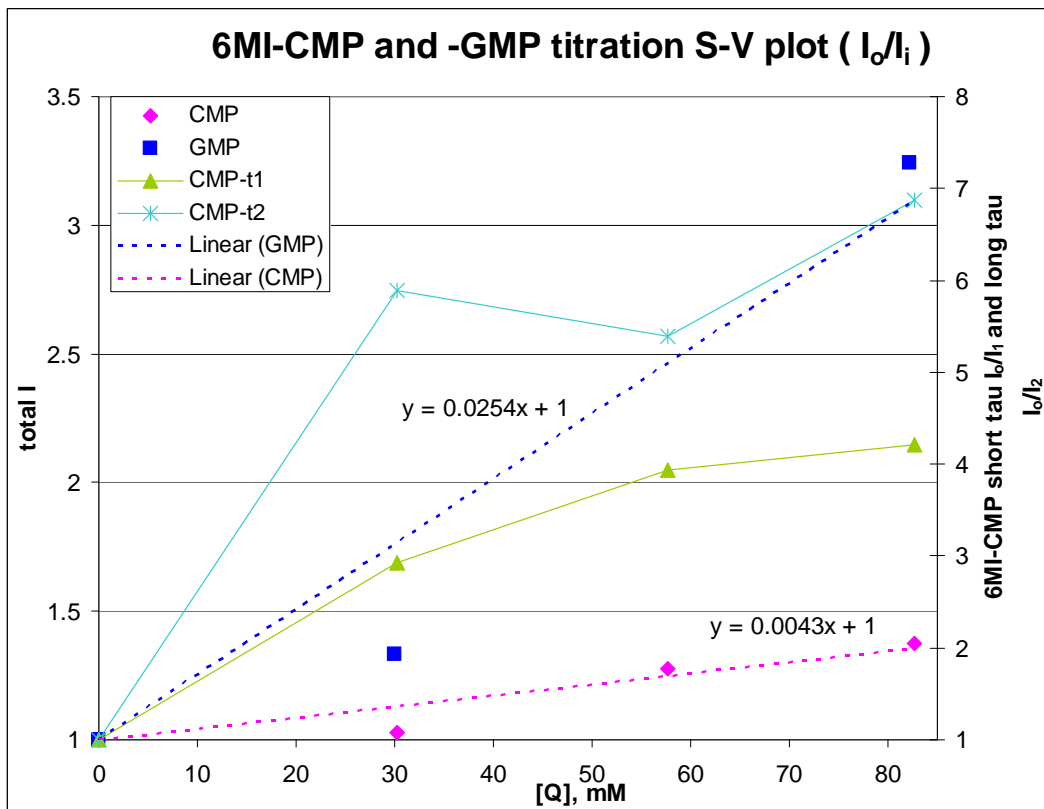

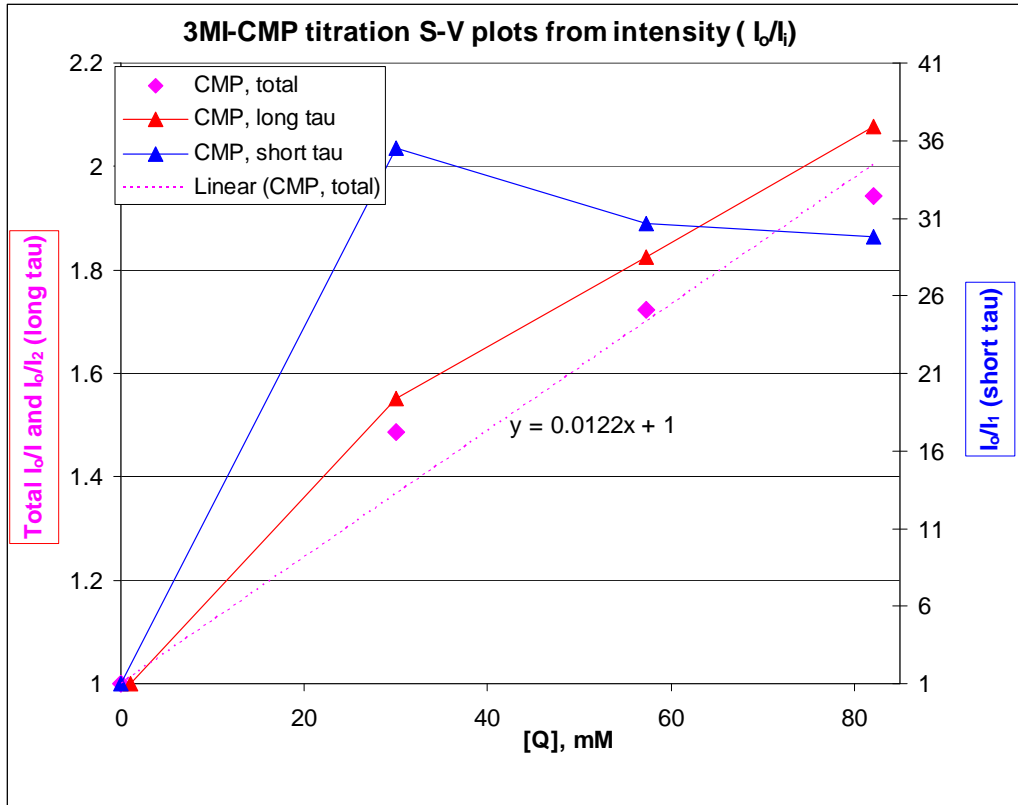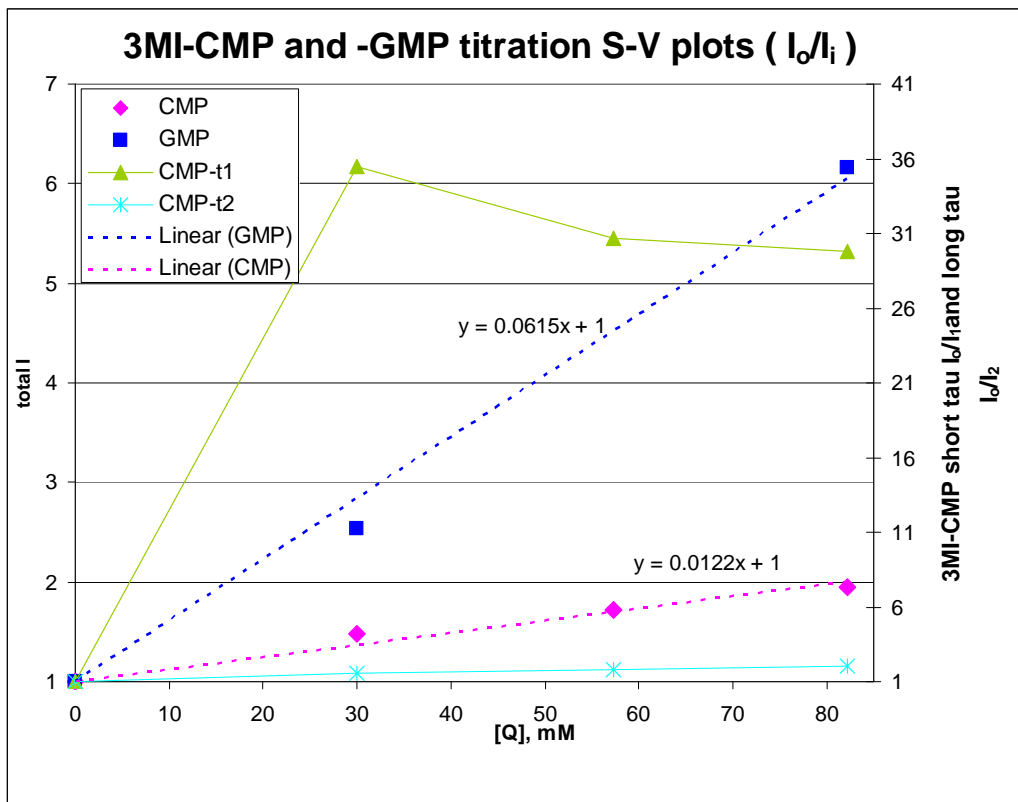

Supplemental Figures caption:

Stern-Volmer plots of 3MI and 6MI.  $I$  values were prepared from fluorescence lifetime decay data by integrating all counts in decay profiles and normalizing these totals with data accumulation times. Laser intensity remained unchanged within 3%. CMP-t1 and CMP-t2 as well as  $I_o/I_1$  and  $I_o/I_2$  refer to short and long lifetime components respectively. Note that plot colors correspond to Y-scales labels. All linear fits were done with uniform weighting and fixing intercept to 1.  $I_i$  intensity components were calculated to be proportional to corresponding  $\alpha_i\tau_i$  products so that  $I_{total} = I_1 + I_2$ . For GMP additions only intensity-weighted average lifetimes were used.
